# Supplementary material for: Teacher Mobility: What Is It, How Is It Measured and What Factors Determine It? A Scoping Review
Source: MDPI journal article supplement (doi:10.3390/ijerph19042313), 2022-02-17
Supplement: s1 [file s1]

# **Supplementary Files to “Teacher Mobility, What Is It, How Is It Measured, And What Factors Determine It? A Scoping Review”**

By Claudia Palma-Vasquez <sup>1,2,\*</sup>, Diego Carrasco <sup>3</sup> and Mónica Tapia-Ladino <sup>1</sup>

<sup>1</sup>Faculty of Education, Universidad Católica de la Santísima Concepción, Concepción 4090541, Chile.

<sup>2</sup> Center for Research in Occupational Health (CiSAL), Department of Experimental and Health Sciences, Pompeu Fabra University, Barcelona 08003, Spain.

<sup>3</sup> Pontificia Universidad Católica de Chile, Centro de Medición MIDE UC. Santiago 7820436, Chile.

\* Correspondence: cpalma@doctoradoedu.ucsc.cl

## **Index:**

- Supplementary Material, Table S1: "Preferred Reporting Items for: Teacher Mobility, What Is It, How Is It Measured, And What Factors Determine It? A Scoping Review" (p. 2-4)
- Supplementary Material, Table S2: "Descriptive characteristics of the publications on: Teacher Mobility, What Is It, How Is It Measured, And What Factors Determine It? A Scoping Review" (p. 5-25)

**Table S1:** Preferred Reporting Items for: Teacher Mobility, What Is It, How Is It Measured, And What Factors Determine It? A Scoping Review

*Note: From the Systematic reviews and Meta-Analyses extension for Scoping Reviews (PRISMA-ScR) Checklist (Tricco et al., 2018)*

| SECTION                           | ITEM | PRISMA-ScR CHECKLIST ITEM                                                                                                                                                                                                                                                 | REPORTED ON PAGE #                                                                                                |
|-----------------------------------|------|---------------------------------------------------------------------------------------------------------------------------------------------------------------------------------------------------------------------------------------------------------------------------|-------------------------------------------------------------------------------------------------------------------|
| TITLE                             |      |                                                                                                                                                                                                                                                                           |                                                                                                                   |
| Title                             | 1    | Identify the report as a scoping review.                                                                                                                                                                                                                                  | page 1<br>(line 2)                                                                                                |
| ABSTRACT                          |      |                                                                                                                                                                                                                                                                           |                                                                                                                   |
| Structured summary                | 2    | Provide a structured summary that includes (as applicable): background, objectives, eligibility criteria, sources of evidence, charting methods, results, and conclusions that relate to the review questions and objectives.                                             | page 1<br>(lines 10-33)                                                                                           |
| INTRODUCTION                      |      |                                                                                                                                                                                                                                                                           |                                                                                                                   |
| Rationale                         | 3    | Describe the rationale for the review in the context of what is already known. Explain why the review questions/objectives lend themselves to a scoping review approach.                                                                                                  | page 2<br>(lines 91-104)                                                                                          |
| Objectives                        | 4    | Provide an explicit statement of the questions and objectives being addressed with reference to their key elements (e.g., population or participants, concepts, and context) or other relevant key elements used to conceptualize the review questions and/or objectives. | page 2<br>(lines 104-107)                                                                                         |
| METHODS                           |      |                                                                                                                                                                                                                                                                           |                                                                                                                   |
| Protocol and registration         | 5    | Indicate whether a review protocol exists; state if and where it can be accessed (e.g., a Web address); and if available, provide registration information, including the registration number.                                                                            | An internal protocol was developed to document the criteria for do this scoping review but this is not published. |
| Eligibility criteria              | 6    | Specify characteristics of the sources of evidence used as eligibility criteria (e.g., years considered, language, and publication status), and provide a rationale.                                                                                                      | page 3<br>(lines 124-137)                                                                                         |
| Information sources*              | 7    | Describe all information sources in the search (e.g., databases with dates of coverage and contact with authors to identify additional sources), as well as the date the most recent search was executed.                                                                 | page 3<br>(lines 138-142)                                                                                         |
| Search                            | 8    | Present the full electronic search strategy for at least 1 database, including any limits used, such that it could be repeated.                                                                                                                                           | page 3-4<br>(lines 143-146)                                                                                       |
| Selection of sources of evidence† | 9    | State the process for selecting sources of evidence (i.e., screening and eligibility) included in the scoping review.                                                                                                                                                     | pages 3-4<br>(lines 108-174)                                                                                      |
| Data charting process‡            | 10   | Describe the methods of charting data from the included sources of evidence (e.g., calibrated forms or forms that have been tested by the team before their use, and whether data charting was done independently or in                                                   | page 5<br>(lines 175-176)                                                                                         |

| SECTION                                               | ITEM | PRISMA-ScR CHECKLIST ITEM                                                                                                                                                                             | REPORTED ON PAGE #                                                                                                |
|-------------------------------------------------------|------|-------------------------------------------------------------------------------------------------------------------------------------------------------------------------------------------------------|-------------------------------------------------------------------------------------------------------------------|
|                                                       |      | duplicate) and any processes for obtaining and confirming data from investigators.                                                                                                                    |                                                                                                                   |
| Data items                                            | 11   | List and define all variables for which data were sought and any assumptions and simplifications made.                                                                                                | page 6<br>(lines 188-191)                                                                                         |
| Critical appraisal of individual sources of evidence§ | 12   | If done, provide a rationale for conducting a critical appraisal of included sources of evidence; describe the methods used and how this information was used in any data synthesis (if appropriate). | page 5-6<br>(lines 178-191)                                                                                       |
| Synthesis of results                                  | 13   | Describe the methods of handling and summarizing the data that were charted.                                                                                                                          | Table S2<br>(Supplementary Materials)                                                                             |
| RESULTS                                               |      |                                                                                                                                                                                                       |                                                                                                                   |
| Selection of sources of evidence                      | 14   | Give numbers of sources of evidence screened, assessed for eligibility, and included in the review, with reasons for exclusions at each stage, ideally using a flow diagram.                          | page 6<br>(lines 193-203)                                                                                         |
| Characteristics of sources of evidence                | 15   | For each source of evidence, present characteristics for which data were charted and provide the citations.                                                                                           | page 10<br>(lines 296)                                                                                            |
| Critical appraisal within sources of evidence         | 16   | If done, present data on critical appraisal of included sources of evidence (see item 12).                                                                                                            | no data                                                                                                           |
| Results of individual sources of evidence             | 17   | For each included source of evidence, present the relevant data that were charted that relate to the review questions and objectives.                                                                 | page 7<br>(lines 209-224, figure 3)<br>page 7<br>(lines 226-294, table 2)<br>page 11<br>(lines 297-371)           |
| Synthesis of results                                  | 18   | Summarize and/or present the charting results as they relate to the review questions and objectives.                                                                                                  | page 6<br>(lines 205-207, figure 2)<br>page 7<br>(lines 223-225, figure 3)<br>page 10<br>(lines 295-296, table 2) |
| DISCUSSION                                            |      |                                                                                                                                                                                                       |                                                                                                                   |
| Summary of evidence                                   | 19   | Summarize the main results (including an overview of concepts, themes, and types of evidence available), link to the review questions and objectives, and consider the relevance to key groups.       | page 12<br>(lines 373-480)                                                                                        |
| Limitations                                           | 20   | Discuss the limitations of the scoping review process.                                                                                                                                                | page 12-14<br>(lines 481-487)                                                                                     |
| Conclusions                                           | 21   | Provide a general interpretation of the results with respect to the review questions and objectives, as well as potential implications and/or next steps.                                             | page 12-14<br>(lines 481-487)                                                                                     |
| FUNDING                                               |      |                                                                                                                                                                                                       |                                                                                                                   |
| Funding                                               | 22   | Describe sources of funding for the included sources of evidence, as well as sources of                                                                                                               | page 14<br>(lines 507-508)                                                                                        |

| SECTION | ITEM | PRISMA-ScR CHECKLIST ITEM                                                               | REPORTED ON PAGE # |
|---------|------|-----------------------------------------------------------------------------------------|--------------------|
|         |      | funding for the scoping review. Describe the role of the funders of the scoping review. |                    |

JBİ = Joanna Briggs Institute; PRISMA-ScR = Preferred Reporting Items for Systematic reviews and Meta-Analyses extension for Scoping Reviews.

\* Where sources of evidence (see second footnote) are compiled from, such as bibliographic databases, social media platforms, and Web sites.

† A more inclusive/heterogeneous term used to account for the different types of evidence or data sources (e.g., quantitative and/or qualitative research, expert opinion, and policy documents) that may be eligible in a scoping review as opposed to only studies. This is not to be confused with information sources (see first footnote).

‡ The frameworks by Arksey and O'Malley (6) and Levac and colleagues (7) and the JBİ guidance (4, 5) refer to the process of data extraction in a scoping review as data charting.

§ The process of systematically examining research evidence to assess its validity, results, and relevance before using it to inform a decision. This term is used for items 12 and 19 instead of "risk of bias" (which is more applicable to systematic reviews of interventions) to include and acknowledge the various sources of evidence that may be used in a scoping review (e.g., quantitative and/or qualitative research, expert opinion, and policy document).

#### Reference:

Tricco, A. C., Lillie, E., Zarin, W., O'Brien, K. K., Colquhoun, H., Levac, D., . . . Weeks, L. (2018). PRISMA extension for scoping reviews (PRISMA-ScR): checklist and explanation. *Annals of internal medicine*, 169(7), 467-473. <https://doi.org/https://doi.org/10.7326/M18-0850>

**Table S2.** Descriptive characteristics of the publications on: Teacher Mobility, What Is It, How Is It Measured, And What Factors Determine It? A Scoping Review

| ID | Source | Year | Type    | Magazine                                         | Authors                                            | Title                                                                                                                     | Country   | Approach                             | Perspective | Race stage                                           |
|----|--------|------|---------|--------------------------------------------------|----------------------------------------------------|---------------------------------------------------------------------------------------------------------------------------|-----------|--------------------------------------|-------------|------------------------------------------------------|
| 1  | WoS CC | 2016 | Article | Modern Language Journal                          | Acheson K. Taylor J. & Luna K.                     | The Burnout Spiral: The Emotion Labor of Five Rural US Foreign Language Teachers                                          | USA       | Qualitative                          | Indirect    | Teaching career                                      |
| 2  | WoS CC | 2017 | Article | Educational Evaluation and Policy Analysis       | Adnot M. Dee T. Katz V. & Wyckoff J.               | Teacher Turnover Teacher Quality and Student Achievement in DCPS                                                          | USA       | Quantitative                         | Direct      | Teaching career                                      |
| 3  | WoS CC | 2015 | Article | Cambridge Journal of Education                   | Adoniou M.                                         | 'It's very much taken as an insult if I say anything': do new educators have a right to speak their mind?                 | Australia | Qualitative                          | Indirect    | Beginning Teachers                                   |
| 4  | GS     | 2010 | Article | International journal of education reform        | Agezo K.                                           | Why teachers leave teaching: The case of pre-tertiary institutions in Ghana.                                              | Ghana     | Qualitative                          | Direct      | Beginning Teachers                                   |
| 5  | WoS CC | 2016 | Article | Questions Vives-Questions in Education           | Alava S.                                           | Teacher facing the difficulty of class: disempowerment and teacher attrition                                              | France    | Quantitative                         | Indirect    | Teaching career                                      |
| 6  | WoS CC | 2016 | Article | Ra Ximhai Magazine                               | Alegria-Rivas L. M. E.                             | School violence: the practice teachers and school leaving.                                                                | Mexico    | Qualitative                          | Indirect    | Teaching career                                      |
| 7  | WoS CC | 2018 | Article | Education Economics                              | Allen R. Burgess S. & Mayo J.                      | The teacher labour market teacher turnover and disadvantaged schools: new evidence for England.                           | England   | Quantitative                         | Direct      | Teaching career                                      |
| 8  | WoS CC | 2014 | Article | Urban Education                                  | Aragon A. Culpepper S. A. McKee M. W. & Perkins M. | Understanding Profiles of Preservice Teachers With Different Levels of Commitment to Teaching in Urban Schools.           | USA       | Quantitative                         | Indirect    | Teacher trainees                                     |
| 9  | WoS CC | 2016 | Article | Australian Journal of Education                  | Arnup J. & Bowles T.                               | Should I stay or should I go? Resilience as a protective factor for teachers' intention to leave the teaching profession. | Australia | Quantitative                         | Indirect    | From Beginning Teachers until 10 years of experience |
| 10 | WoS CC | 2016 | Article | International Journal of Educational Development | Avalos B. & Valenzuela J. P.                       | Education for all and attrition/retention of new teachers: A trajectory study in Chile.                                   | Chile     | Mixed (quantitative and qualitative) | Direct      | Beginning Teachers                                   |
| 11 | GS     | 2009 | Article | American Politics                                | Balu R. Béteille T. & Loeb S.                      | Examining teacher turnover: The role of school leadership.                                                                | USA       | Quantitative                         | Direct      | Teaching career                                      |

|    |        |      |                          |                                               |                                                                                    |                                                                                                                                   |             |                                      |          |                    |
|----|--------|------|--------------------------|-----------------------------------------------|------------------------------------------------------------------------------------|-----------------------------------------------------------------------------------------------------------------------------------|-------------|--------------------------------------|----------|--------------------|
| 12 | WoS CC | 2011 | Article                  | Economics of Education Review                 | Barbieri G. Rossetti C. & Sestito P.                                               | The determinants of teacher mobility: Evidence using Italian teachers' transfer applications.                                     | Italy       | Quantitative                         | Indirect | Teaching career    |
| 13 | GS     | 2014 | Report/ Technical Report | National Institute for Excellence in Teaching | Barnett J. H. & Hudgens T. M.                                                      | Staying Power: The Impact of the TAP System on Retaining Teachers Nationwide.                                                     | USA         | Quantitative                         | Direct   | Teaching career    |
| 14 | GS     | 2014 | Article                  | Education                                     | Battle A. & Looney L.                                                              | Teachers' intentions to stay in teaching: The role of values and knowledge of adolescent development.                             | USA         | Mixed (quantitative and qualitative) | Indirect | Teaching career    |
| 15 | WoS CC | 2014 | Article                  | Qualitative Inquiry                           | Beaton J.                                                                          | Perceiving Professional Risk in Five Stories.                                                                                     | USA         | Qualitative                          | Indirect | Beginning Teachers |
| 16 | WoS CC | 2017 | Article                  | Remedial and Special Education                | Bettini E. Jones N. Brownell M. Conroy M. Park Y. Leite W. Crockett J. Benedict A. | Workload Manageability Among Novice Special and General Educators: Relationships With Emotional Exhaustion and Career Intentions. | USA         | Quantitative                         | Indirect | Beginning Teachers |
| 17 | GS     | 2012 | Article                  | Georgia Educational Researcher                | Bhatnagar R. Kim J. & Many J. E.                                                   | One Urban College of Education's Examination of Graduates' Employment and Retention in Public Schools.                            | USA         | Quantitative                         | Direct   | Teaching career    |
| 18 | WoS CC | 2008 | Article                  | Exceptional Children                          | Boe E. E. E. Cook L. H. & Sunderland R. J.                                         | Teacher turnover: Examining exit attrition teaching area transfer and school migration.                                           | USA         | Quantitative                         | Direct   | Teaching career    |
| 19 | WoS CC | 2016 | Article                  | Economic Journal                              | Bonhomme S. Jolivet G. & Leuven E.                                                 | School Characteristics and Teacher Turnover: Assessing the Role of Preferences and Opportunities.                                 | Netherlands | Quantitative                         | Direct   | Teaching career    |
| 20 | GS     | 2009 | Report/ Technical Report | Mathematica Policy Research Inc.              | Booker K. & Glazerman S.                                                           | Effects of the Missouri Career Ladder Program on Teacher Mobility.                                                                | USA         | Quantitative                         | Direct   | Teaching career    |
| 21 | GS     | 2013 | Article                  | Leadership and Policy Quarterly               | Bower C. B.                                                                        | Teacher Retention and School Performance in High-Poverty Urban Schools: Evidence from New York City Middle Schools.               | USA         | Quantitative                         | Direct   | Teaching career    |
| 22 | GS     | 2011 | Article                  | American Educational Research Journal         | Boyd D. Grossman P. Ing M. Lankford H. Loeb S. & Wyckoff J.                        | The influence of school administrators on teacher retention decisions.                                                            | USA         | Quantitative                         | Direct   | Teaching career    |
| 23 | GS     | 2013 | Article                  | Electronic Journal of Science Education       | Bozeman T. D. Scoggin S. & Stuessy C.                                              | Job satisfaction of high school science teachers: Prevalence and association with teacher retention.                              | USA         | Quantitative                         | Direct   | Teaching career    |
| 24 | WoS CC | 2012 | Article                  | Economic Record                               | Bradley S. Green C. & Mangan J.                                                    | The Effect of Relative Wages and External Shocks on Public Sector Turnover.                                                       | Australia   | Quantitative                         | Direct   | Teaching career    |

|    |        |      |                          |                                            |                                                                                |                                                                                                                                        |           |              |          |                    |
|----|--------|------|--------------------------|--------------------------------------------|--------------------------------------------------------------------------------|----------------------------------------------------------------------------------------------------------------------------------------|-----------|--------------|----------|--------------------|
| 25 | WoS CC | 2017 | Article                  | Educational Policy                         | Brummet Q. Gershenson S. & Hayes M. S. (2017).                                 | Teachers' Grade-Level Reassignments: Evidence From Michigan.                                                                           | USA       | Quantitative | Direct   | Teaching career    |
| 26 | WoS CC | 2016 | Article                  | Questions Vives-Recherches En Education    | Bruno F. (2016).                                                               | Prendre en compte les élèves à risque de décrochage scolaire au sein du cours disciplinaire : une prise de risque pour les enseignants | France    | Quantitative | Indirect | Teaching career    |
| 27 | WoS CC | 2010 | Article                  | Asia Pacific Journal of Education          | Buchanan J. (2010).                                                            | May I be excused? Why teachers leave the profession.                                                                                   | Australia | Qualitative  | Direct   | Teaching career    |
| 28 | WoS CC | 2012 | Article                  | Australian Journal of Education            | Buchanan J. (2012).                                                            | Telling tales out of school: Exploring why former teachers are not returning to the classroom.                                         | Australia | Qualitative  | Direct   | Teaching career    |
| 29 | GS     | 2015 | Article                  | Teaching and Teacher Education             | Burke P. F. Aubusson P. J. Schuck S. R. Buchanan J. D. & Prescott A. E. (2015) | How do early career teachers value different types of support? A scale-adjusted latent class choice model.                             | Australia | Quantitative | Indirect | Beginning Teachers |
| 30 | WoS CC | 2017 | Article                  | Educational Evaluation and Policy Analysis | Burkhauser S. (2017).                                                          | How Much Do School Principals Matter When It Comes to Teacher Working Conditions?                                                      | USA       | Quantitative | Indirect | Teaching career    |
| 31 | WoS CC | 2016 | Article                  | In Education                               | Burleigh D. (2016).                                                            | Teacher Attrition in a Northern Ontario Remote First Nation: A Narrative Re-Storying.                                                  | Canada    | Qualitative  | Indirect | Teaching career    |
| 32 | GS     | 2013 | Article                  | SSRN                                       | Calimeris L. (2013).                                                           | Teacher Attrition in Charter and Public Schools.                                                                                       | USA       | Quantitative | Direct   | Teaching career    |
| 33 | WoS CC | 2013 | Article                  | Education and Treatment of Children        | Cancio E. J. Albrecht S. F. & Johns B. H. (2013).                              | Defining Administrative Support and Its Relationship to the Attrition of Teachers of Students with Emotional and Behavioral Disorders. | USA       | Quantitative | Indirect | Teaching career    |
| 34 | WoS CC | 2010 | Article                  | Journal of Health Psychology               | Carson R. L. Baumgartner J. J. Matthews R. A. & Tsouloupas C. N. (2010)        | Emotional Exhaustion Absenteeism and Turnover Intentions in Childcare Teachers Examining the Impact of Physical Activity Behaviors     | USA       | Quantitative | Indirect | Teaching career    |
| 35 | GS     | 2017 | Report/ Technical Report | Learning Policy Institute                  | Carver-Thomas D. & Darling-Hammond L. (2017).                                  | Teacher turnover: Why it matters and what we can do about it.                                                                          | USA       | Quantitative | Direct   | Teaching career    |

|    |              |      |         |                                                |                                                                                                                         |                                                                                                          |        |              |          |                    |
|----|--------------|------|---------|------------------------------------------------|-------------------------------------------------------------------------------------------------------------------------|----------------------------------------------------------------------------------------------------------|--------|--------------|----------|--------------------|
| 36 | Scielo<br>CI | 2014 | Article | Education & Society                            | Cassetari N. Scaldelai V. D. F. & Frutuoso P. C. (2014).                                                                | Exoneração a pedido de professores: estudo em duas redes municipais paulistas                            | Brazil | Quantitative | Direct   | Teaching career    |
| 37 | WoS CC       | 2010 | Article | Teaching and Teacher Education                 | Castro A. J. Kelly J. & Shih M. (2010).                                                                                 | Resilience strategies for new teachers in high-needs areas.                                              | USA    | Qualitative  | Indirect | Beginning Teachers |
| 38 | WoS CC       | 2011 | Article | School Effectiveness and School Improvement    | Cha S. H. & Cohen-Vogel L. (2011).                                                                                      | Why they quit: a focused look at teachers who leave for other occupations.                               | USA    | Quantitative | Direct   | Teaching career    |
| 39 | WoS CC       | 2018 | Article | International Journal of Public Administration | Choi Y. & Chung I. H. (2018).                                                                                           | Effects of Public Service Motivation on Turnover and Job Satisfaction in the US Teacher Labor Market.    | USA    | Quantitative | Indirect | Teaching career    |
| 40 | WoS CC       | 2016 | Article | European Journal of Teacher Education          | Christophersen K. A. Elstad E. Solhaug T. & Turmo A. (2016).                                                            | Antecedents of student teachers' affective commitment to the teaching profession and turnover intention. | Norway | Quantitative | Indirect | Teacher trainees   |
| 41 | WoS CC       | 2015 | Article | Teaching and Teacher Education                 | Clandinin D. Long J. Schaefer L. Downey C. A. Steeves P. Pinnegar E. Robblee S. M. & Wnuk S.                            | Early career teacher attrition: intentions of teachers beginning.                                        | Canada | Qualitative  | Indirect | Beginning Teachers |
| 42 | WoS CC       | 2017 | Article | Teaching and Teacher Education                 | Clara M. (2017).                                                                                                        | Teacher resilience and meaning transformation: How teachers reappraise situations of adversity.          | Spain  | Qualitative  | Indirect | Teaching career    |
| 43 | WoS CC       | 2011 | Article | Education Finance and Policy                   | Clotfelter C. T. Ladd H. F. & Vigdor J. L. (2011).                                                                      | Teacher mobility school segregation and pay-based policies to level the playing field.                   | USA    | Quantitative | Direct   | Teaching career    |
| 44 | WoS CC       | 2012 | Article | American Educational Research Journal          | Cochran-Smith M. McQuillan P. Mitchell K. Terrell D. G. Barnatt J. D'Souza L. Jong C. Shakman K. Lam K. & Gleeson A. M. | A Longitudinal Study of Teaching Practice and Early Career Decisions: A Cautionary Tale.                 | USA    | Qualitative  | Direct   | Beginning Teachers |
| 45 | WoS CC       | 2012 | Article | Economics of Education Review                  | Cowen J. M. Butler J. S. Fowles J. Streams M. E. & Toma E. F. (2012).                                                   | Teacher retention in Appalachian schools: Evidence from Kentucky.                                        | USA    | Quantitative | Direct   | Teaching career    |



|    |        |      |                          |                                                                  |                                                              |                                                                                                                                                       |                      |              |          |                                   |
|----|--------|------|--------------------------|------------------------------------------------------------------|--------------------------------------------------------------|-------------------------------------------------------------------------------------------------------------------------------------------------------|----------------------|--------------|----------|-----------------------------------|
| 46 | WoS CC | 2013 | Article                  | Education Finance and Policy                                     | Cowen J. M. & Winters M. A. (2013).                          | Do charters retain teachers differently? evidence from elementary schools in Florida.                                                                 | USA                  | Quantitative | Direct   | Teaching career                   |
| 47 | WoS CC | 2014 | Article                  | Journal of Curriculum Studies                                    | Craig C. J. (2014).                                          | From stories of staying to stories of leaving: a US beginning teacher's experience.                                                                   | USA                  | Qualitative  | Direct   | Beginning Teachers                |
| 48 | GS     | 2012 | Article                  | International Scholarly Research Network (ISR Network Education) | Curtis C. (2012).                                            | Keeping Our Nation's Mathematics Teachers.                                                                                                            | USA                  | Quantitative | Indirect | Teaching career                   |
| 49 | GS     | 2017 | Article                  | Alberta Journal of Educational Research                          | Dahlkamp S. Peters M. L. & Schumacher G. (2017)              | Principal Self-Efficacy School Climate and Teacher Retention: A Multi-Level Analysis.                                                                 | USA                  | Quantitative | Indirect | Teaching career                   |
| 50 | WoS CC | 2011 | Article                  | Education and Urban Society                                      | DeAngelis K. J. & Presley J. B. (2011).                      | Toward a More Nuanced Understanding of New Teacher Attrition.                                                                                         | USA                  | Quantitative | Direct   | Teaching career                   |
| 51 | GS     | 2013 | Article                  | Education Policy Analysis Archives                               | DeAngelis K. J. (2013)                                       | A look at returning teachers.                                                                                                                         | USA                  | Quantitative | Direct   | Teaching career                   |
| 52 | WoS CC | 2013 | Article                  | Journal of Teacher Education                                     | DeAngelis K. J. Wall A. F. & Che J. (2013).                  | The Impact of Preservice Preparation and Early Career Support on Novice Teachers' Career Intentions and Decisions.                                    | USA                  | Quantitative | Indirect | Pre-service to Beginning Teachers |
| 53 | GS     | 2017 | Report/ Technical Report | Center for Alaska Education Policy Research                      | DeFeo D. J. Tran T. Hirshberg D. Cope D. & Cravez P. (2017). | The cost of teacher turnover in Alaska.                                                                                                               | USA                  | Quantitative | Direct   | Pre-services teachers             |
| 54 | WoS CC | 2016 | Article                  | Learning and Teaching in Higher Education-Gulf Perspectives      | Dickson M. McMinn M. & Kadbey H. (2016).                     | Science anxiety levels in Emirati student teachers.                                                                                                   | United Arab Emirates | Quantitative | Indirect | Pre-services teachers             |
| 55 | WoS CC | 2009 | Article                  | Perspectives in Education                                        | Diko N. N. & Letseka M. (2009).                              | Policy appropriation in teacher retention and attrition: the case of North-West Province.                                                             | South Africa         | Qualitative  | Direct   | Pre-service to Beginning Teachers |
| 56 | WoS CC | 2016 | Article                  | Race Ethnicity and Education                                     | Djonko-Moore C. M. (2016).                                   | An exploration of teacher attrition and mobility in high poverty racially segregated schools.                                                         | USA                  | Quantitative | Direct   | Pre-services teachers             |
| 57 | GS     | 2010 | Article                  | Educational Evaluation and Policy Analysis                       | Donaldson M. L. & Johnson S. M. (2010).                      | The price of misassignment: The role of teaching assignments in Teach for America teachers' exit from low-income schools and the teaching profession. | USA                  | Quantitative | Direct   | Beginning Teachers                |
| 58 | WoS CC | 2016 | Article                  | International Journal of Educational Research                    | Donitsa-Schmidt S. & Zuzovsky R. (2016).                     | Quantitative and qualitative teacher shortage and the turnover phenomenon.                                                                            | Israel               | Quantitative | Direct   | Teaching career                   |

|    |        |      |                          |                                                                                           |                                                          |                                                                                                                 |           |                                      |          |                    |
|----|--------|------|--------------------------|-------------------------------------------------------------------------------------------|----------------------------------------------------------|-----------------------------------------------------------------------------------------------------------------|-----------|--------------------------------------|----------|--------------------|
| 59 | WoS CC | 2018 | Article                  | Education and Urban Society                                                               | Dunn A. H. & Downey C. A.                                | Betting the House: Teacher Investment Identity and Attrition in Urban Schools.                                  | USA       | Qualitative                          | Indirect | Teaching career    |
| 60 | WoS CC | 2016 | Article                  | British Educational Research Journal                                                      | Dupriez V. Delvaux B. & Lothaire S. (2016).              | Teacher shortage and attrition: Why do they leave?                                                              | Belgium   | Quantitative                         | Direct   | Beginning Teachers |
| 61 | GS     | 2017 | Report/ Technical Report | University of Washington College of Education Center for the Study of Teaching and Policy | Elfers A. M. Plecki M. L. & Van Windekens A. (2017).     | Understanding Teacher Retention and Mobility in Washington State.                                               | USA       | Quantitative                         | Direct   | Teaching career    |
| 62 | WoS CC | 2011 | Article                  | American Economic Review                                                                  | Falch T. (2011).                                         | Teacher Mobility Responses to Wage Changes: Evidence from a Quasi-Natural Experiment.                           | Norway    | Quantitative                         | Direct   | Teaching career    |
| 63 | WoS CC | 2018 | Article                  | Urban Education                                                                           | Farinde-Wu A. & Fitchett P. G. (2018).                   | Searching for Satisfaction: Black Female Teachers' Workplace Climate and Job Satisfaction.                      | USA       | Quantitative                         | Indirect | Teaching career    |
| 64 | WoS CC | 2009 | Article                  | Southern Economic Journal                                                                 | Feng L. (2009).                                          | Opportunity Wages Classroom Characteristics and Teacher Mobility.                                               | USA       | Quantitative                         | Direct   | Teaching career    |
| 65 | WoS CC | 2010 | Article                  | Education Finance and Policy                                                              | Feng L. (2010).                                          | Hire today gone tomorrow: new teacher classroom assignments and teacher mobility.                               | USA       | Quantitative                         | Direct   | Beginning Teachers |
| 66 | WoS CC | 2018 | Article                  | Journal of Urban Economics                                                                | Feng L, Figlio D. & Sass T. (2018).                      | School accountability and teacher mobility.                                                                     | USA       | Quantitative                         | Direct   | Teaching career    |
| 67 | WoS CC | 2012 | Article                  | Andrew Young School of Policy Studies Research Paper Series                               | Feng L. & Sass T. (2012)                                 | Teacher quality and teacher mobility.                                                                           | USA       | Quantitative                         | Direct   | Teaching career    |
| 68 | WoS CC | 2017 | Article                  | Education Finance and Policy                                                              | Feng L. & Sass T. R. (2017).                             | Teacher Quality and Teacher Mobility.                                                                           | USA       | Quantitative                         | Direct   | Teaching career    |
| 69 | GS     | 2011 | Article                  | Alberta Journal of Educational Research                                                   | Fontaine S. Kane R. Duquette O. & Savoie-Zajc L. (2011). | New teachers' career intentions: Factors influencing new teachers' decisions to stay or to leave the profession | Australia | Mixed (quantitative and qualitative) | Indirect | Beginning Teachers |

|    |           |      |         |                                            |                                                                                  |                                                                                                                    |           |                                      |          |                    |
|----|-----------|------|---------|--------------------------------------------|----------------------------------------------------------------------------------|--------------------------------------------------------------------------------------------------------------------|-----------|--------------------------------------|----------|--------------------|
| 70 | WoS CC    | 2009 | Article | Journal of Teacher Education               | Freedman S. W. & Appleman D. (2009)                                              | "In It for the Long Haul" How Teacher Education Can Contribute to Teacher Retention in High-Poverty Urban Schools. | USA       | Mixed (quantitative and qualitative) | Direct   | Beginning Teachers |
| 71 | WoS CC    | 2017 | Article | Reflective Practice                        | Frelin A. & Fransson G. (2017).                                                  | Four components that sustain teachers' commitment to students - a relational and temporal model.                   | Sweden    | Qualitative                          | Indirect | Teaching career    |
| 72 | WoS CC    | 2014 | Article | Educational Evaluation and Policy Analysis | Fulbeck E. S. (2014).                                                            | Teacher Mobility and Financial Incentives: A Descriptive Analysis of Denver's ProComp.                             | USA       | Quantitative                         | Direct   | Teaching career    |
| 73 | WoS CC    | 2015 | Article | Teachers College Record                    | Fulbeck E. S. & Richards M. P. (2015).                                           | The Impact of School-Based Financial Incentives on Teachers' Strategic Moves: A Descriptive Analysis.              | USA       | Quantitative                         | Direct   | Teaching career    |
| 74 | WoS CC    | 2016 | Article | American Journal of Education              | Fuller B. Waite A. & Iribarra D. T. (2016).                                      | Explaining Teacher Turnover: School Cohesion and Intrinsic Motivation in Los Angeles.                              | USA       | Quantitative                         | Indirect | Teaching career    |
| 75 | Scielo CI | 2017 | Article | Pedagogical studies (Valdivia)             | Gaete Silva A. Castro Navarrete M. Pino Conejeros F. & Mansilla Devia D. (2017). | Leaving the teaching profession in Chile: Reasons for leaving the classroom and conditions for returning.          | Chile     | Qualitative                          | Direct   | Teaching career    |
| 76 | WoS CC    | 2017 | Article | Teachers and Teaching                      | Gallant A. & Riley P. (2017).                                                    | Early career teacher attrition in Australia: inconvenient truths about new public management.                      | Australia | Qualitative                          | Indirect | Beginning Teachers |
| 77 | WoS CC    | 2011 | Article | Economics of Education Review              | Gilpin G. A. (2011).                                                             | Reevaluating the effect of non-teaching wages on teacher attrition.                                                | USA       | Quantitative                         | Direct   | Teaching career    |
| 78 | WoS CC    | 2018 | Article | Teachers and Teaching                      | Glazer J (2018).                                                                 | Leaving lessons: learning from the exit decisions of experienced teachers.                                         | USA       | Qualitative                          | Direct   | Teaching career    |
| 79 | GS        | 2016 | Article | Journal of Education and Training Studies  | Glennie E. J. Mason M. & Edmunds J. A. (2016).                                   | Retention and satisfaction of novice teachers: Lessons from a school reform model.                                 | USA       | Quantitative                         | Direct   | Beginning Teachers |
| 80 | WoS CC    | 2011 | Article | Journal of Policy Analysis and Management  | Goldhaber D. Gross B. & Player D. (2011)                                         | Teacher Career Paths, Teacher Quality, and Persistence in the Classroom: Are Public Schools                        | USA       | Quantitative                         | Direct   | Beginning Teachers |

|    |        |      |         |                                                      |                                                           |                                                                                                                                                                 |          |              |          |                    |
|----|--------|------|---------|------------------------------------------------------|-----------------------------------------------------------|-----------------------------------------------------------------------------------------------------------------------------------------------------------------|----------|--------------|----------|--------------------|
| 81 | WoS CC | 2014 | Article | Journal of Teacher Education                         | Goldhaber D. & Cowan J. (2014).                           | Excavating the Teacher Pipeline: Teacher Preparation Programs and Teacher Attrition.                                                                            | USA      | Quantitative | Direct   | Teaching career    |
| 82 | WoS CC | 2015 | Article | Educational Researcher                               | Goldhaber D. Grout C. Holden K. L. & Brown N. (2015).     | Crossing the Border? Exploring the Cross-State Mobility of the Teacher Workforce.                                                                               | USA      | Quantitative | Direct   | Teaching career    |
| 83 | WoS CC | 2016 | Article | Journal of Policy Analysis and Management            | Goldhaber D. Lavery L. & Theobald R. (2016).              | Inconvenient Truth? Do Collective Bargaining Agreements Help Explain the Mobility of Teachers within School Districts?                                          | USA      | Quantitative | Direct   | Teaching career    |
| 84 | WoS CC | 2016 | Article | Educational Evaluation and Policy Analysis           | Goldhaber D. Strunk K. O. Brown N. & Knight D. S. (2016). | Lessons Learned From the Great Recession: Layoffs and the RIF-Induced Teacher Shuffle.                                                                          | USA      | Quantitative | Direct   | Teaching career    |
| 85 | WoS CC | 2015 | Article | International Journal of Instruction                 | Gomba C. (2015).                                          | Why Do They Stay: Factors Influencing Teacher Retention in Rural Zimbabwe.                                                                                      | Zimbabwe | Qualitative  | Direct   | Teaching career    |
| 86 | WoS CC | 2016 | Article | Educational Studies                                  | Gottfried M. A. & Straubhaar R. (2015).                   | The perceived role of the Teach For America program on teachers' long-term career aspirations.                                                                  | USA      | Qualitative  | Indirect | Beginning Teachers |
| 87 | WoS CC | 2011 | Article | Journal of Policy Analysis and Management            | Grissom J. A. & Keiser L. R. (2011).                      | A Supervisor Like Me: Race Representation and the Satisfaction and Turnover Decisions of Public Sector Employees.                                               | USA      | Quantitative | Indirect | Teaching career    |
| 88 | WoS CC | 2011 | Article | Teachers College Record                              | Grissom J. A. (2011).                                     | Can Good Principals Keep Teachers in Disadvantaged Schools? Linking Principal Effectiveness to Teacher Satisfaction and Turnover in Hard-to-Staff Environments. | USA      | Quantitative | Indirect | Teaching career    |
| 89 | GS     | 2014 | Article | Teachers and Teaching                                | Gu Q. (2014).                                             | The role of relational resilience in teachers' career-long commitment and effectiveness.                                                                        | England  | Qualitative  | Indirect | Teaching career    |
| 90 | GS     | 2016 | Article | Journal of Organizational and Educational Leadership | Gulosino C. Franceschini III L. & Hardman P. (2016).      | The Influence of Balance Within the Competing Values Framework and School Academic Success on Teacher Retention.                                                | USA      | Quantitative | Indirect | Teaching career    |

|     |        |      |         |                                            |                                                       |                                                                                                                                          |           |                                      |          |                    |
|-----|--------|------|---------|--------------------------------------------|-------------------------------------------------------|------------------------------------------------------------------------------------------------------------------------------------------|-----------|--------------------------------------|----------|--------------------|
| 91  | WoS CC | 2008 | Article | Journal of Experimental Education          | Hahs-Vaughn D. L. & Scherff L. (2008).                | Beginning English teacher attrition mobility and retention. Journal of Experimental Education                                            | USA       | Quantitative                         | Indirect | Beginning Teachers |
| 92  | GS     | 2008 | Article | Journal of Research in Music Education     | Hancock C. B. (2008).                                 | Music Teachers at Risk for Attrition and Migration: An Analysis of the 1999-2000 Schools and Staffing Survey.                            | USA       | Quantitative                         | Indirect | Teaching career    |
| 93  | WoS CC | 2009 | Article | Journal of Research in Music Education     | Hancock C. B. (2009)                                  | National Estimates of Retention Migration and Attrition A Multiyear Comparison of Music and Non-music Teachers.                          | USA       | Quantitative                         | Direct   | Teaching career    |
| 94  | GS     | 2016 | Article | Journal of Research in Music Education     | Hancock C. B. (2016).                                 | Is the grass greener? Current and former music teachers' perceptions a year after moving to a different school or leaving the classroom. | USA       | Quantitative                         | Direct   | Teaching career    |
| 95  | WoS CC | 2010 | Article | Journal of Teacher Education               | Hancock C. B. & Scherff L. (2010).                    | Who Will Stay and Who Will Leave? Predicting Secondary English Teacher Attrition Risk.                                                   | USA       | Quantitative                         | Indirect | Teaching career    |
| 96  | WoS CC | 2016 | Article | Educational Evaluation and Policy Analysis | Hansen M. Backes B. & Brady V. (2016).                | Teacher Attrition and Mobility During the Teach for America Clustering Strategy in Miami-Dade County Public Schools.                     | USA       | Quantitative                         | Direct   | Teaching career    |
| 97  | WoS CC | 2016 | Article | Economics of Education Review              | Hanushek E. A. Rivkin S. G. & Schiman J. C. (2016).   | Dynamic effects of teacher turnover on the quality of instruction.                                                                       | USA       | Quantitative                         | Direct   | Teaching career    |
| 98  | WoS CC | 2015 | Article | Journal of Teacher Education               | Harfitt G. J. (2015).                                 | From attrition to retention: a narrative inquiry of why beginning teachers leave and then rejoin the profession.                         | Hong Kong | Qualitative                          | Direct   | Beginning Teachers |
| 99  | WoS CC | 2014 | Article | Urban Education                            | Heineke A. J. Mazza B. S. & Tichnor-Wagner A. (2014). | After the Two-Year Commitment: A Quantitative and Qualitative Inquiry of Teach For America Teacher Retention and Attrition               | USA       | Mixed (quantitative and qualitative) | Direct   | Beginning Teachers |
| 100 | WoS CC | 2014 | Article | Journal of Public Economics                | Hendricks M. D. (2014).                               | Does it pay to pay teachers more? Evidence from Texas. Journal of Public Economics                                                       | USA       | Quantitative                         | Direct   | Teaching career    |

|     |        |      |         |                                            |                                                   |                                                                                                                                              |     |                                      |          |                    |
|-----|--------|------|---------|--------------------------------------------|---------------------------------------------------|----------------------------------------------------------------------------------------------------------------------------------------------|-----|--------------------------------------|----------|--------------------|
| 101 | GS     | 2015 | Article | SSRN                                       | Hendricks M. D. (2015).                           | Public Schools Are Hemorrhaging Talented Teachers: Can Higher Salaries Function as a Tourniquet?                                             | USA | Quantitative                         | Direct   | Teaching career    |
| 102 | WoS CC | 2011 | Article | Educational Researcher                     | Henry G. T. Bastian K. C. & Fortner C. K. (2011). | Stayers and Leavers: Early-Career Teacher Effectiveness and Attrition.                                                                       | USA | Quantitative                         | Direct   | Beginning Teachers |
| 103 | WoS CC | 2010 | Article | Teaching and Teacher Education             | Hong J. Y. (2010).                                | Pre-service and beginning teachers' professional identity and its relation to dropping out of the profession. Teaching and Teacher Education | USA | Mixed (quantitative and qualitative) | Direct   | Teacher trainees   |
| 104 | WoS CC | 2012 | Article | Teachers and Teaching                      | Hong J. Y. (2012)                                 | Why do some beginning teachers leave the school and others stay? Understanding teacher resilience through psychological lenses.              | USA | Qualitative                          | Direct   | Beginning Teachers |
| 105 | WoS CC | 2018 | Article | Teaching and Teacher Education             | Horvath M. Goodell J. E. & Kostea V. D. (2018).   | Decisions to enter and continue in the teaching profession: Evidence from a sample of US secondary STEM teacher candidates.                  | USA | Quantitative                         | Indirect | Beginning Teachers |
| 106 | WoS CC | 2015 | Article | Issues in Educational Research             | Howes L. M. & Goodman-Delahunty J. (2015).        | Teachers' career decisions: Perspectives on choosing teaching careers and on staying or leaving.                                             | USA | Qualitative                          | Direct   | Teaching career    |
| 107 | GS     | 2012 | Article | The Journal of Educational Research        | Hughes G. D. (2012).                              | Teacher retention: Teacher characteristics school characteristics organizational characteristics and teacher efficacy.                       | USA | Quantitative                         | Indirect | Teaching career    |
| 108 | GS     | 2016 | Article | FWU Journal of Social Sciences             | Husain W. Gulzar A. & Aqeel M. (2016).            | The mediating role of depression anxiety and stress between job strain and turnover intentions among male and female teachers.               | USA | Quantitative                         | Indirect | Teaching career    |
| 109 | WoS CC | 2012 | Article | Educational Evaluation and Policy Analysis | Ingersoll R. M. & May H. (2012).                  | The Magnitude Destinations and Determinants of Mathematics and Science Teacher Turnover.                                                     | USA | Quantitative                         | Direct   | Teaching career    |
| 110 | WoS CC | 2010 | Article | American Educational Research Journal      | Ingersoll R. M. & Perda D. (2010).                | Is the Supply of Mathematics and Science Teachers Sufficient?                                                                                | USA | Quantitative                         | Direct   | Teaching career    |

|     |        |      |         |                                            |                                                           |                                                                                                                                                                        |                                                                     |              |          |                    |
|-----|--------|------|---------|--------------------------------------------|-----------------------------------------------------------|------------------------------------------------------------------------------------------------------------------------------------------------------------------------|---------------------------------------------------------------------|--------------|----------|--------------------|
| 111 | WoS CC | 2015 | Article | International Migration                    | Iredale R. R. Voigt-Graf C. & Khoo S. E. (2015).          | Trends in International and Internal Teacher Mobility in Three Pacific Island Countries.                                                                               | Fiji Cook Islands Vanuatu (Pacific Islands)                         | Quantitative | Indirect | Teaching career    |
| 112 | WoS CC | 2015 | Article | Educational Evaluation and Policy Analysis | Jacob R. Goddard R. Kim M. Miller R. & Goddard Y. (2015). | Exploring the Causal Impact of the McREL Balanced Leadership Program on Leadership Principal Efficacy Instructional Climate Educator Turnover and Student Achievement. | USA                                                                 | Quantitative | Indirect | Teaching career    |
| 113 | WoS CC | 2013 | Article | Public Management Review                   | Johansen M. (2013).                                       | The impact of managerial quality on employee turnover.                                                                                                                 | USA                                                                 | Quantitative | Direct   | Teaching career    |
| 114 | WoS CC | 2012 | Article | Teachers College Record                    | Johnson S. M. Kraft M. A. & Papay J. P. (2012).           | How Context Matters in High-Need Schools: The Effects of Teachers' Working Conditions on Their Professional Satisfaction and Their Students' Achievement.              | USA                                                                 | Quantitative | Indirect | Teaching career    |
| 115 | WoS CC | 2013 | Article | Economics of Education Review              | Jones M. D. (2013).                                       | Teacher behavior under performance pay incentives.                                                                                                                     | USA                                                                 | Quantitative | Direct   | Teaching career    |
| 116 | GS     | 2016 | Article | Global Education Review                    | Kaden U. Patterson P. P. Healy J. & Adams B. L. (2016).   | Stemming the revolving door: teacher retention and attrition in Arctic Alaska schools.                                                                                 | USA                                                                 | Quantitative | Direct   | Teaching career    |
| 117 | WoS CC | 2015 | Article | American Educational Research Journal      | Kelly S. & Northrop L. (2015).                            | Early Career Outcomes for the "Best and the Brightest": Selectivity Satisfaction and Attrition in the Beginning Teacher Longitudinal Survey.                           | USA                                                                 | Quantitative | Direct   | Beginning Teachers |
| 118 | WoS CC | 2009 | Article | Journal of Educational Research            | Kukla-Acevedo S. (2009).                                  | Leavers Movers and Stayers: The Role of Workplace Conditions in Teacher Mobility Decisions.                                                                            | USA                                                                 | Quantitative | Direct   | Teaching career    |
| 119 | GS     | 2012 | Article | African Journal of Business Management     | Kumar D. (2012).                                          | Compensation factors and coping styles: Cross country study on faculty members.                                                                                        | India Pakistan Bangladesh Oman Egypt Indonesia Philippines Malaysia | Quantitative | Indirect | Teaching career    |
| 120 | GS     | 2009 | Article | Journal of Educational Administration      | Kyle Ingle W. (2009).                                     | Teacher quality and attrition in a US school district.                                                                                                                 | USA                                                                 | Quantitative | Direct   | Teaching career    |

|     |        |      |                          |                                                                      |                                                        |                                                                                                           |         |                                      |          |                    |
|-----|--------|------|--------------------------|----------------------------------------------------------------------|--------------------------------------------------------|-----------------------------------------------------------------------------------------------------------|---------|--------------------------------------|----------|--------------------|
| 121 | WoS CC | 2011 | Article                  | Educational Evaluation and Policy Analysis                           | Ladd H. F. (2011).                                     | Teachers' Perceptions of Their Working Conditions: How Predictive of Planned and Actual Teacher Movement? | USA     | Quantitative                         | Indirect | Teaching career    |
| 122 | WoS CC | 2017 | Article                  | Teaching and Teacher Education                                       | Lanas M. (2017).                                       | Giving up the lottery ticket: Finnish beginning teacher turnover as a question of discursive boundaries.  | Finland | Qualitative                          | Indirect | Teacher trainees   |
| 123 | WoS CC | 2014 | Article                  | Teaching and Teacher Education                                       | Lavigne A. L. (2014).                                  | Beginning teachers who stay: Beliefs about students.                                                      | USA     | Quantitative                         | Indirect | Beginning Teachers |
| 124 | WoS CC | 2016 | Article                  | Teaching and Teacher Education                                       | Lindqvist P. & Nordanger U. K. (2016).                 | Already elsewhere - A study of (skilled) teachers' choice to leave teaching.                              | Sweden  | Qualitative                          | Direct   | Teaching career    |
| 125 | WoS CC | 2014 | Article                  | Teaching and Teacher Education                                       | Lindqvist P. Nordanger U. K. & Carlsson R. (2014).     | Teacher attrition the first five years - A multifaceted image.                                            | Sweden  | Mixed (quantitative and qualitative) | Direct   | Beginning Teachers |
| 126 | WoS CC | 2012 | Article                  | Educational Psychology                                               | Liu S. (2012).                                         | The influences of school climate and teacher compensation on teachers' turnover intention in China.       | China   | Quantitative                         | Indirect | Teaching career    |
| 127 | GS     | 2008 | Article                  | Teaching and Teacher Education                                       | Liu X. S. & Ramsey J. (2008).                          | Teachers' job satisfaction: Analyses of the teacher follow-up survey in the United States for 2000-2001.  | USA     | Quantitative                         | Indirect | Teaching career    |
| 128 | GS     | 2012 | Article                  | Teacher education quarterly                                          | Lloyd M. E. R. & Sullivan A. (2012).                   | Leaving the profession: The context behind one quality teacher's professional burn out.                   | USA     | Qualitative                          | Direct   | Beginning Teachers |
| 129 | GS     | 2016 | Article                  | Education and Urban Society                                          | LoCascio S. J. Smeaton P. S. & Waters F. H. (2016).    | How induction programs affect the decision of alternate route urban teachers to remain teaching.          | USA     | Mixed (quantitative and qualitative) | Indirect | Beginning Teachers |
| 130 | GS     | 2016 | Report/ Technical Report | Regional Educational Laboratory Appalachia                           | Lochmiller C. R. Sugimoto T. J. & Muller P. A. (2016). | Teacher Retention Mobility and Attrition in Kentucky Public Schools from 2008 to 2012.C387A               | USA     | Quantitative                         | Direct   | Teaching career    |
| 131 | WoS CC | 2009 | Article                  | Hispania a Journal Devoted to the Teaching of Spanish and Portuguese | Lopez-Gomez C. & Albright J. J. (2009).                | Working Conditions of Foreign Language Teachers: Results from a Pilot Survey.                             | USA     | Quantitative                         | Indirect | Teaching career    |



|     |        |      |                          |                                                              |                                                         |                                                                                                                |              |              |          |                    |
|-----|--------|------|--------------------------|--------------------------------------------------------------|---------------------------------------------------------|----------------------------------------------------------------------------------------------------------------|--------------|--------------|----------|--------------------|
| 132 | WoS CC | 2014 | Article                  | Physical Education and Sport Pedagogy                        | Makela K. Hirvensalo M. Laakso L. & Whipp P. R. (2014). | Physical education teachers in motion: an account of attrition and area transfer.                              | Finland      | Quantitative | Direct   | Teaching career    |
| 133 | WoS CC | 2015 | Article                  | Journal of Teaching in Physical Education                    | Makela K. Hirvensalo M. & Whipp P. (2015).              | Determinants of PE Teachers Career Intentions.                                                                 | Finland      | Quantitative | Indirect | Teaching career    |
| 134 | WoS CC | 2015 | Article                  | Sa Journal of Human Resource Management                      | Makhuzeni B. & Barkhuizen E. N. (2015).                 | The effect of a total rewards strategy on school teachers' retention                                           | South Africa | Qualitative  | Indirect | Teaching career    |
| 135 | WoS CC | 2016 | Article                  | English in Australia                                         | Manuel J. & Carter D. (2016).                           | Sustaining Hope and Possibility: Early-Career English Teachers' Perspectives on Their First Years of Teaching. | Australia    | Qualitative  | Indirect | Beginning Teachers |
| 136 | WoS CC | 2008 | Article                  | Teachers College Record                                      | Margolis J. (2008).                                     | What Will Keep Today's Teachers Teaching? Looking for a Hook as a New Career Cycle Emerges.                    | USA          | Qualitative  | Indirect | Beginning Teachers |
| 137 | GS     | 2013 | Report/ Technical Report | The Research Alliance for New York City Schools              | Marinell W. H. & Coca V. M. (2013).                     | Who Stays and Who Leaves? Findings from a Three-Part Study of Teacher Turnover in NYC Middle Schools.          | USA          | Quantitative | Direct   | Teaching career    |
| 138 | WoS CC | 2017 | Article                  | Public Administration Review                                 | Marvel J. D. (2017).                                    | Not Seeing Eye to Eye on Frontline Work: Manager-Employee Disagreement and Its Effects on Employees.           | USA          | Quantitative | Indirect | Teaching career    |
| 139 | GS     | 2010 | Article                  | International Journal of Construction Education and Research | McCandless D. W. Bruce R. D. & Gebken R. J. (2010).     | Retention of Construction Teachers in Secondary Education.                                                     | USA          | Quantitative | Direct   | Beginning Teachers |
| 140 | GS     | 2017 | Article                  | International Journal of STEM Education                      | McConnell J. R. (2017).                                 | A model for understanding teachers' intentions to remain in STEM education.                                    | USA          | Quantitative | Indirect | Teaching career    |
| 141 | GS     | 2012 | Article                  | International Journal of Business and Management Tomorrow    | Mehta S.                                                | Faculty Attrition: A Challenge for Private Management Institutions.                                            | India        | Quantitative | Indirect | Teaching career    |

|     |        |      |                          |                                                 |                                                                 |                                                                                                                                  |           |                                      |          |                    |
|-----|--------|------|--------------------------|-------------------------------------------------|-----------------------------------------------------------------|----------------------------------------------------------------------------------------------------------------------------------|-----------|--------------------------------------|----------|--------------------|
| 142 | GS     | 2012 | Article                  | Journal of Research in Rural Education (Online) | Miller L. C. (2012).                                            | Situating the rural teacher labor market in the broader context: A descriptive analysis of the market dynamics in New York State | USA       | Quantitative                         | Direct   | Teaching career    |
| 143 | WoS CC | 2017 | Article                  | Qualitative Sociology                           | Nelson J. L. (2017).                                            | Pathways to Green(er) Pastures: Reward Bundles Human Capital and Turnover Decisions in a Semi-Profession.                        | USA       | Qualitative                          | Direct   | Teaching career    |
| 144 | WoS CC | 2017 | Article                  | Teachers and Teaching                           | Newberry M. & Allsop Y. (2017).                                 | Teacher attrition in the USA: the relational elements in a Utah case study.                                                      | USA       | Qualitative                          | Direct   | Teaching career    |
| 145 | WoS CC | 2015 | Article                  | Economics of Education Review                   | Ost B. & Schiman J. C. (2015).                                  | Grade-specific experience grade reassignments and teacher turnover. Economics of Education Review                                | USA       | Quantitative                         | Direct   | Teaching career    |
| 146 | GS     | 2010 | Report/ Technical Report | John F. Kennedy School of Government.           | Owens A. (2010).                                                | The Massachusetts teacher workforce: Status and challenges:                                                                      | USA       | Quantitative                         | Direct   | Teaching career    |
| 147 | WoS CC | 2015 | Article                  | Educational Sciences-Theory & Practice          | Ozoglu M. (2015).                                               | Mobility-Related Teacher Turnover and the Unequal Distribution of Experienced Teachers in Turkey.                                | Turkey    | Mixed (quantitative and qualitative) | Direct   | Teaching career    |
| 148 | GS     | 2009 | Report/ Technical Report | New Teacher Center                              | O'Malley G. M.                                                  | Teaching Empowering Leading and Learning Maryland Survey Coalition.                                                              | USA       | Quantitative                         | Indirect | Teaching career    |
| 149 | WoS CC | 2017 | Article                  | Educational Researcher                          | Papay J. P. Bacher-Hicks A. Page L. C. & Marinell W. H. (2017). | The Challenge of Teacher Retention in Urban Schools: Evidence of Variation From a Cross-Site Analysis.                           | USA       | Quantitative                         | Direct   | Teaching career    |
| 150 | WoS CC | 2018 | Article                  | Personality and Individual Differences          | Perera H. N. Granziera H. & McIlveen P. (2018).                 | Profiles of teacher personality and relations with teacher self-efficacy work engagement and job satisfaction.                   | Australia | Quantitative                         | Indirect | Teaching career    |
| 151 | WoS CC | 2012 | Article                  | Teachers and Teaching                           | Peters J. & Pearce J. (2012).                                   | Relationships and early career teacher resilience: a role for school principals.                                                 | Australia | Qualitative                          | Indirect | Beginning Teachers |
| 152 | WoS CC | 2017 | Article                  | Teaching and Teacher Education                  | Player D. Youngs P. Perrone F. & Grogan E. (2017).              | How principal leadership and person-job fit are associated with teacher mobility and attrition.                                  | USA       | Quantitative                         | Direct   | Teaching career    |

|     |        |      |                          |                                         |                                                                            |                                                                                                                                              |           |                                      |          |                    |
|-----|--------|------|--------------------------|-----------------------------------------|----------------------------------------------------------------------------|----------------------------------------------------------------------------------------------------------------------------------------------|-----------|--------------------------------------|----------|--------------------|
| 153 | GS     | 2011 | Article                  | Australian Journal of Teacher Education | Plunkett M. & Dyson M. (2011).                                             | Becoming a teacher and staying one: Examining the complex ecologies associated with educating and retaining new teachers in rural Australia? | Australia | Quantitative                         | Indirect | Beginning Teachers |
| 154 | GS     | 2016 | Report/ Technical Report | Regional Educational Laboratory Midwest | Podgursky M. Ehler M. Lindsay J. & Wan Y. (2016).                          | An Examination of the Movement of Educators within and across Three Midwest Region States. REL 2017-185.                                     | USA       | Quantitative                         | Direct   | Teaching career    |
| 155 | WoS CC | 2012 | Article                  | Social Science Research                 | Price H. E. & Collett J. L. (2012).                                        | The role of exchange and emotion on commitment: A study of teachers.                                                                         | USA       | Quantitative                         | Indirect | Teaching career    |
| 156 | WoS CC | 2015 | Article                  | Improving Schools                       | Pyhalto K. Pietarinen J. & Soini T. (2015).                                | When teaching gets tough Professional community inhibitors of teacher-targeted bullying and turnover intentions.                             | Finland   | Quantitative                         | Indirect | Teaching career    |
| 157 | WoS CC | 2008 | Article                  | Teachers College Record                 | Quartz K. H. Thomas A. Anderson L. Masyn K. Lyons K. B. & Olsen B. (2008). | Careers in Motion: A Longitudinal Retention Study of Role Changing Among Early-Career Urban Educators.                                       | USA       | Quantitative                         | Direct   | Teaching career    |
| 158 | WoS CC | 2016 | Article                  | American Educational Research Journal   | Redding C. & Smith T. M. (2016).                                           | Easy in Easy out: Are Alternatively Certified Teachers Turning Over at Increased Rates?                                                      | USA       | Quantitative                         | Direct   | Teaching career    |
| 159 | WoS CC | 2017 | Article                  | Teaching Education                      | Rinke C. R. & Mawhinney L. (2017).                                         | Insights from teacher leavers: push and pull in career development.                                                                          | USA       | Qualitative                          | Direct   | Teaching career    |
| 160 | WoS CC | 2011 | Article                  | Science Education                       | Ritchie S. M. Tobin K. Hudson P. Roth W. M. & Mergard V. (2011).           | Reproducing Successful Rituals in Bad Times: Exploring Emotional Interactions of a New Science Teacher.                                      | Australia | Qualitative                          | Indirect | Beginning Teachers |
| 161 | WoS CC | 2018 | Article                  | Educational Policy                      | Robertson-Kraft C. & Zhang R. S. (2018).                                   | Keeping Great Teachers: A Case Study on the Impact and Implementation of a Pilot Teacher Evaluation System.                                  | USA       | Mixed (quantitative and qualitative) | Direct   | Teaching career    |
| 162 | WoS CC | 2013 | Article                  | American Educational Research Journal   | Ronfeldt M. Loeb S. & Wyckoff J. (2013).                                   | How Teacher Turnover Harms Student Achievement.                                                                                              | USA       | Quantitative                         | Direct   | Teaching career    |

|     |        |      |         |                                                         |                                                                                         |                                                                                                                                                        |           |              |          |                    |
|-----|--------|------|---------|---------------------------------------------------------|-----------------------------------------------------------------------------------------|--------------------------------------------------------------------------------------------------------------------------------------------------------|-----------|--------------|----------|--------------------|
| 163 | GS     | 2008 | Article | American String Teacher                                 | Russell J. (2008).                                                                      | The Projected Career Plans of String Music Educators: Implications for the Profession.                                                                 | USA       | Quantitative | Indirect | Teaching career    |
| 164 | WoS CC | 2008 | Article | Journal of Research in Music Education                  | Russell J. A. (2008).                                                                   | A Discriminant Analysis of the Factors Associated With the Career Plans of String Music Educators.                                                     | USA       | Quantitative | Indirect | Teaching career    |
| 165 | WoS CC | 2012 | Article | Bulletin of the Council for Research in Music Education | Russell J. A. (2012).                                                                   | The Short and Long-Term Career Plans of Secondary Music Educators: Characteristics of Stayers Movers and Leavers.                                      | USA       | Quantitative | Indirect | Teaching career    |
| 166 | WoS CC | 2017 | Article | Teaching and Teacher Education                          | Ryan S. V. von der Embse N. P. Pendergast L. L. Saeki E. Segool N. & Schwing S. (2017). | Leaving the teaching profession: The role of teacher stress and educational accountability policies on turnover intent                                 | USA       | Quantitative | Indirect | Teaching career    |
| 167 | WoS CC | 2013 | Article | Research in Science Education                           | Saka Y. Southerland S. A. Kittleson J. & Hutner T. (2013).                              | Understanding the Induction of a Science Teacher: The Interaction of Identity and Context.                                                             | USA       | Qualitative  | Indirect | Beginning Teachers |
| 168 | WoS CC | 2011 | Article | American Journal of Education                           | Santoro D. A. (2011).                                                                   | Good Teaching in Difficult Times: Demoralization in the Pursuit of Good Work.                                                                          | USA       | Qualitative  | Indirect | Teaching career    |
| 169 | WoS CC | 2011 | Article | Teachers College Record                                 | Santoro D. A. & Morehouse L. (2011).                                                    | Teaching's Conscientious Objectors: Principled Leavers of High-Poverty Schools.                                                                        | USA       | Qualitative  | Direct   | Teaching career    |
| 170 | GS     | 2012 | Article | National Teacher Education Journal                      | Sedivy-Benton A. L. & Boden McGill C. J. (2012).                                        | Significant Factors for Teachers' Intentions to Stay or Leave the Profession: Teacher Influence on School Perception of Control and Perceived Support. | USA       | Quantitative | Indirect | Teaching career    |
| 171 | WoS CC | 2014 | Article | Asia-Pacific Journal of Teacher Education               | Shann S. Germantse H. Pittard L. & Cunneen R. (2014).                                   | Community and conversation: tackling beginning teacher doubt and disillusionment.                                                                      | USA       | Qualitative  | Indirect | Beginning Teachers |
| 172 | WoS CC | 2009 | Article | Australian Journal of Education                         | Sharplin E. (2009).                                                                     | Bringing them in: The experiences of imported and overseas-qualified teachers.                                                                         | Australia | Qualitative  | Direct   | Teaching career    |

|     |        |      |         |                                               |                                                                                    |                                                                                                                                                                                    |           |              |          |                    |
|-----|--------|------|---------|-----------------------------------------------|------------------------------------------------------------------------------------|------------------------------------------------------------------------------------------------------------------------------------------------------------------------------------|-----------|--------------|----------|--------------------|
| 173 | WoS CC | 2014 | Article | Educational Research                          | Sharplin E. D. (2014).                                                             | Reconceptualising out-of-field teaching: experiences of rural teachers in Western Australia.                                                                                       | Australia | Qualitative  | Direct   | Teaching career    |
| 174 | GS     | 2018 | Article | National Institute Economic Review            | Sims S. & Allen R. (2018).                                                         | Identifying Schools With High Usage and High Loss of Newly Qualified Teachers.                                                                                                     | England   | Quantitative | Direct   | Beginning Teachers |
| 175 | WoS CC | 2017 | Article | Teachers and Teaching                         | Smith K. & Ulvik M. (2017).                                                        | Leaving teaching: lack of resilience or sign of agency?                                                                                                                            | Norway    | Qualitative  | Direct   | Beginning Teachers |
| 176 | GS     | 2009 | Article | Education Policy Analysis Archives            | Sohn K. (2009).                                                                    | Teacher turnover: An issue of workgroup racial diversity.                                                                                                                          | USA       | Quantitative | Direct   | Teaching career    |
| 177 | WoS CC | 2017 | Article | Modern Journal of Language Teaching Methods   | Soozandehfar S. M. A. & Adeli M. R. (2017).                                        | Factors contributing to Iranian efl teachers' burnout and retention.                                                                                                               | Iran      | Qualitative  | Indirect | Teaching career    |
| 178 | WoS CC | 2016 | Article | Educational Evaluation and Policy Analysis    | Springer M. G. Swain W. A. & Rodriguez L. A. (2016).                               | Effective Teacher Retention Bonuses: Evidence From Tennessee.                                                                                                                      | USA       | Quantitative | Direct   | Teaching career    |
| 179 | WoS CC | 2016 | Article | Journal of Education Finance                  | Springer M. G. & Taylor L. L. (2016).                                              | Designing Incentives for Public School Teachers: Evidence from a Texas Incentive Pay Program.                                                                                      | USA       | Quantitative | Direct   | Teaching career    |
| 180 | WoS CC | 2015 | Article | Economics of Education Review                 | Steele J. L. Pepper M. J. Springer M. G. & Lockwood J. (2015).                     | The distribution and mobility of effective teachers: Evidence from a large urban school district.                                                                                  | USA       | Quantitative | Direct   | Teaching career    |
| 181 | WoS CC | 2016 | Article | Journal of Professional Capital and Community | Struyve C. Daly A. Vandecandelaere M. Meredith C. Hannes K. & De Fraine B. (2016). | More than a mentor The role of social connectedness in early career and experienced teachers' intention to leave.                                                                  | Belgium   | Quantitative | Indirect | Beginning Teachers |
| 182 | WoS CC | 2014 | Article | Teaching and Teacher Education                | Struyven K. & Vanthournout G. (2014).                                              | Teachers' exit decisions: An investigation into the reasons why newly qualified teachers fail to enter the teaching profession or why those who do enter do not continue teaching. | Belgium   | Quantitative | Direct   | Beginning Teachers |
| 183 | WoS CC | 2012 | Article | Pedagogical Studies                           | Struyven K. Vrancken S. Brepoels K. Engels N. & Lombaerts K. (2012).               | Being a teacher? Thanks but no thanks. An investigation into the motives for teachers in Flanders not being willing to start or                                                    | Belgium   | Quantitative | Direct   | Beginning Teachers |

|     |        |      |                          |                                                                        |                                                                                     |                                                                                                                                                    |                |                                      |          |                 |
|-----|--------|------|--------------------------|------------------------------------------------------------------------|-------------------------------------------------------------------------------------|----------------------------------------------------------------------------------------------------------------------------------------------------|----------------|--------------------------------------|----------|-----------------|
|     |        |      |                          |                                                                        |                                                                                     | continue teaching five years after graduation.                                                                                                     |                |                                      |          |                 |
| 184 | WoS CC | 2012 | Article                  | Economics of Education Review                                          | Stuit D. A. & Smith T. M. (2012).                                                   | Explaining the gap in charter and traditional public school teacher turnover rates.                                                                | USA            | Quantitative                         | Direct   | Teaching career |
| 185 | GS     | 2017 | Report/ Technical Report | Regional Educational Laboratory Southwest                              | Sullivan K. Barkowski E. Lindsay J. Lazarev V. Nguyen T. Newman D. & Lin L. (2017). | Trends in Teacher Mobility in Texas and Associations with Teacher Student and School Characteristics. REL 2018-283.                                | USA            | Quantitative                         | Direct   | Teaching career |
| 186 | WoS CC | 2017 | Article                  | School Effectiveness and School Improvement                            | Sun M. Saultz A. & Ye Y. (2017).                                                    | Federal policy and the teacher labor market: exploring the effects of NCLB school accountability on teacher turnover.                              | USA            | Quantitative                         | Direct   | Teaching career |
| 187 | WoS CC | 2012 | Article                  | Canadian Modern Language Review- Revue Canadienne Des Langues Vivantes | Swanson P. (2012).                                                                  | Second/Foreign Language Teacher Efficacy and its Relationship to Professional Attrition.                                                           | USA and Canada | Quantitative                         | Indirect | Teaching career |
| 188 | WoS CC | 2014 | Article                  | Hispania-a Journal Devoted to the Teaching of Spanish and Portuguese   | Swanson P. (2014).                                                                  | The Power of Belief: Spanish Teachers' Sense of Efficacy and Student Performance on the National Spanish Examinations.                             | Spain          | Quantitative                         | Indirect | Teaching career |
| 189 | WoS CC | 2010 | Article                  | Hispania-a Journal Devoted to the Teaching of Spanish and Portuguese   | Swanson P. B. (2010).                                                               | Teacher Efficacy and Attrition: Helping Students at Introductory Levels of Language Instruction Appears Critical.                                  | USA            | Quantitative                         | Indirect | Teaching career |
| 190 | WoS CC | 2009 | Article                  | Journal of Teacher Education                                           | Swars S. L. Meyers B. Mays L. C. & Lack B. (2009).                                  | A Two-Dimensional Model of Teacher Retention and Mobility Classroom Teachers and Their University Partners Take a Closer Look at a Vexing Problem. | USA            | Mixed (quantitative and qualitative) | Indirect | Teaching career |

|     |        |      |         |                                       |                                           |                                                                                                                                                       |           |                                      |          |                       |
|-----|--------|------|---------|---------------------------------------|-------------------------------------------|-------------------------------------------------------------------------------------------------------------------------------------------------------|-----------|--------------------------------------|----------|-----------------------|
| 191 | WoS CC | 2010 | Article | Teaching and Teacher Education        | Tamir E. (2010).                          | The retention question in context-specific teacher education: Do beginning teachers and their program leaders see teachers' future career eye to eye. | USA       | Qualitative                          | Indirect | Pre-services teachers |
| 192 | WoS CC | 2011 | Article | Teaching and Teacher Education        | Tickle B. R. Chang M. D. & Kim S. (2011). | Administrative support and its mediating effect on US public school teachers.                                                                         | USA       | Quantitative                         | Indirect | Teaching career       |
| 193 | WoS CC | 2015 | Article | Cambridge Journal of Education        | Tiplic D. Brandmo C. & Elstad E. (2015).  | Antecedents of Norwegian beginning teachers' turnover intentions.                                                                                     | Norway    | Quantitative                         | Indirect | Beginning Teachers    |
| 194 | GS     | 2016 | Article | Journal of School Leadership          | Torres A. C.                              | The Uncertainty of High Expectations: How Principals Influence Relational Trust and Teacher Turnover in No Excuses Charter Schools                    | USA       | Qualitative                          | Indirect | Teaching career       |
| 195 | WoS CC | 2016 | Article | Urban Education                       | Torres A. C.                              | Is This Work Sustainable? Teacher Turnover and Perceptions of Workload in Charter Management Organizations.                                           | USA       | Quantitative                         | Direct   | Teaching career       |
| 196 | GS     | 2016 | Article | Journal of School Choice              | Torres A. C. (2016).                      | Teacher efficacy and disciplinary expectations in charter schools: Understanding the link to teachers' career decisions                               | USA       | Qualitative                          | Direct   | Teaching career       |
| 197 | GS     | 2012 | Article | Journal of Educational Change         | Torres A. S. (2012).                      | "Hello goodbye: Exploring the phenomenon of leaving teaching early.                                                                                   | USA       | Mixed (quantitative and qualitative) | Direct   | Beginning Teachers    |
| 198 | WoS CC | 2018 | Article | Journal of Educational Administration | Torres D. G. (2018).                      | Distributed leadership and teacher job satisfaction in Singapore.                                                                                     | Singapore | Quantitative                         | Indirect | Teaching career       |
| 199 | WoS CC | 2017 | Article | Teachers and Teaching                 | Towers E. & Maguire M. (2017).            | Leaving or staying in teaching: a 'vignette' of an experienced urban teacher 'leaver' of a London primary school.                                     | England   | Qualitative                          | Direct   | Teaching career       |
| 200 | WoS CC | 2017 | Article | Research Papers in Education          | Trent J (2017).                           | Discourse agency and teacher attrition: exploring stories to leave by amongst former early career English language teachers in Hong Kong.             | Hong Kong | Qualitative                          | Direct   | Beginning Teachers    |

|     |        |      |         |                                                    |                                                                                 |                                                                                                                                                                                                   |         |                                      |          |                    |
|-----|--------|------|---------|----------------------------------------------------|---------------------------------------------------------------------------------|---------------------------------------------------------------------------------------------------------------------------------------------------------------------------------------------------|---------|--------------------------------------|----------|--------------------|
| 201 | WoS CC | 2015 | Article | Teachers and Teaching                              | Tricarico K. M. Jacobs J. & Yendol-Hoppey D. (2015).                            | Reflection on their first five years of teaching: understanding staying and impact power.                                                                                                         | USA     | Qualitative                          | Indirect | Beginning Teachers |
| 202 | WoS CC | 2010 | Article | Educational Psychology                             | Tsouloupas C. N. Carson R. L. Matthews R. Grawitch M. J. & Barber L. K. (2010). | Exploring the association between teachers' perceived student misbehaviour and emotional exhaustion: the importance of teacher efficacy beliefs and emotion regulation.                           | USA     | Quantitative                         | Indirect | Teaching career    |
| 203 | WoS CC | 2014 | Article | Research on Aging                                  | Van Droogenbroeck F. & Spruyt B. (2014).                                        | To Stop or Not to Stop: An Empirical Assessment of the Determinants of Early Retirement Among Active and Retired Senior Teachers.                                                                 | Belgium | Quantitative                         | Direct   | Teaching career    |
| 204 | WoS CC | 2016 | Article | International Journal of Aging & Human Development | Van Droogenbroeck F. & Spruyt B. (2016).                                        | I Ain't Gonna Make It. Comparing Job Demands-Resources and Attrition Intention Between Senior Teachers and Senior Employees of Six Other Occupational Categories in Flanders.                     | Belgium | Quantitative                         | Indirect | Teaching career    |
| 205 | GS     | 2015 | Article | Journal of Educational Administration              | Van Maele D. & Van Houtte M. (2015).                                            | Trust in school: a pathway to inhibit teacher burnout?                                                                                                                                            | Belgium | Quantitative                         | Indirect | Teaching career    |
| 206 | WoS CC | 2017 | Article | Educational Review                                 | Vekeman E. Devos G. Valcke M. & Rosseel Y. (2017).                              | Do teachers leave the profession or move to another school when they don't fit?                                                                                                                   | Belgium | Quantitative                         | Indirect | Teaching career    |
| 207 | GS     | 2017 | Article | Educational Management                             | Vekeman E. Devos G. Valcke M. & Rosseel Y. (2017).                              | Principals' configuration of a bundle of human resource practices. Does it make a difference for the relationship between teachers' fit job satisfaction and intention to move to another school? | Belgium | Mixed (quantitative and qualitative) | Indirect | Teaching career    |
| 208 | GS     | 2018 | Article | Teaching and Program Development                   | Watson J. M. (2018).                                                            | Job Embeddedness May Hold the Key to the Retention of Novice Talent in Schools. Educational Leadership and Administration                                                                         | USA     | Quantitative                         | Indirect | Beginning Teachers |
| 209 | GS     | 2016 | Article | Education Leadership Review                        | Watson J. M. & Olson-Buchanan J. (2016).                                        | Using Job Embeddedness to Explain New Teacher Retention.                                                                                                                                          | USA     | Quantitative                         | Indirect | Beginning Teachers |



|     |        |      |         |                                      |                                    |                                                                                                                                  |        |              |          |                    |
|-----|--------|------|---------|--------------------------------------|------------------------------------|----------------------------------------------------------------------------------------------------------------------------------|--------|--------------|----------|--------------------|
| 210 | WoS CC | 2015 | Article | Early Childhood Research Quarterly   | Wells M. B. (2015).                | Predicting preschool teacher retention and turnover in newly hired Head Start teachers across the first half of the school year. | USA    | Quantitative | Indirect | Beginning Teachers |
| 211 | GS     | 2017 | Article | Urban Education                      | Whipp J. L. & Geronime L. (2017).  | Experiences that predict early career teacher commitment to and retention in high-poverty urban schools.                         | USA    | Quantitative | Direct   | Beginning Teachers |
| 212 | WoS CC | 2012 | Article | Kuram Ve Uygulamada Egitim Bilimleri | Yesil Dagli U. (2012).             | America's Public School Kindergarten Teachers' Job Turnover and Associated Factors                                               | USA    | Quantitative | Direct   | Teaching career    |
| 213 | WoS CC | 2017 | Article | Teachers and Teaching                | Yinon H. & Orland-Barak L. (2017). | Career stories of Israeli teachers who left teaching: a salutogenic view of teacher attrition.                                   | Israel | Qualitative  | Direct   | Teaching career    |
